# Supplementary material for: The Recycling of Substandard Rocket Fuel N,N-Dimethylhydrazine via the Involvement of Its Hydrazones Derived from Glyoxal, Acrolein, Metacrolein, Crotonaldehyde, and Formaldehyde in Organic Synthesis
Source: MDPI journal article supplement (doi:10.3390/ijms242417196), 2023-12-06
Supplement: s1 [file s1]

## Supporting information

# Recycling of Substandard Rocket Fuel N,N-Dimethylhydrazine via the Involvement of Its Hydrazones Derived from Glyoxal, Acrolein, Metacrolein, Crotonaldehyde, and Formaldehyde in Organic Synthesis.

*Elizaveta Ivanova<sup>1</sup>, Margarita Osipova<sup>1</sup>, Tatyana Vasilieva<sup>1</sup>, Alexey Eremkin<sup>1</sup>, Svetlana Markova<sup>1</sup>, Ekaterina Zazhivihina<sup>1</sup>, Svetlana Smirnova<sup>1</sup>, Elena Turusova<sup>1</sup>, Yurii Mitrasov<sup>2</sup> and Oleg Nasakin<sup>1,\*</sup>*

*<sup>1</sup>Ulyanov Chuvash State University, Moskovsky pr., 15, Cheboksary 428015, Russia*

*<sup>2</sup>Organic and Pharmaceutical Chemistry Department, Yakovlev Chuvash State Pedagogical University, K. Marx Street, 38, 428000, Cheboksary, Russia*

*\*Corresponding author. Tel.: +7 903 345 57 33 (Oleg E. Nasakin); +7 961 340 01*

*81 (Elizaveta S.Ivanova).*

*E-mail address: ecopan21@inbox.ru (O.E. Nasakin), lizachimic@mail.ru (E.S. Ivanova)*

**Table S1.** Inhibitory activity against kinaza p38 $\alpha$ , IC<sub>50</sub>\*10<sup>-6</sup>M.

|                                                                                   |                                                                                   |                                                                                   |                                                                                    |                                                                                     |
|-----------------------------------------------------------------------------------|-----------------------------------------------------------------------------------|-----------------------------------------------------------------------------------|------------------------------------------------------------------------------------|-------------------------------------------------------------------------------------|
| 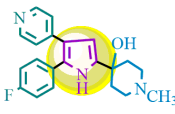 |  |  |  |  |
| 0.13                                                                              | 0.09                                                                              | 0.45                                                                              | 0.35                                                                               | 2                                                                                   |

**Table S2.** Antibacterial activity. Diameter of the inhibitory zone (nm).

| Compounds                                                                                          | <i>Mucor miehei</i> | <i>Paecilomyces varioti</i> | <i>Penicillium notatum</i> | <i>Nematospora coryli</i> |
|----------------------------------------------------------------------------------------------------|---------------------|-----------------------------|----------------------------|---------------------------|
| 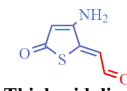<br>Thiobasidalin | 15                  | 11                          | -                          | 16                        |
|                   | -                   | -                           | -                          | -                         |
|                  | 20                  | 20                          | 12                         | 22                        |
|                 | 15                  | 11                          | -                          | 13                        |
|                 | 18                  | 15                          | -                          | 15                        |
|                 | 11                  | 10                          | -                          | 9                         |
|                 | 9                   | 9                           | -                          | 10                        |

**Table S3.** Antifungal activity. Diameter of the inhibitory zone (nm).

| Compounds                                                                                                 | <i>Bacillus subtilis</i> | <i>Bacillus brevis</i> | <i>Micrococcus luteus</i> | <i>Nematospora coryli</i> |
|-----------------------------------------------------------------------------------------------------------|--------------------------|------------------------|---------------------------|---------------------------|
| <br><b>Thiobasidalin</b> | -                        | -                      | -                         | -                         |
| <br><b>10</b>            | 10                       | 19                     | -                         | -                         |
| <br><b>8</b>             | 8                        | -                      | -                         | -                         |
| <br><b>19</b>            | 19                       | -                      | -                         | 20                        |

**Table S4.** Antitumor activity of compounds **98** and **101** (IC<sub>50</sub>\*10<sup>-6</sup>M).

| Compounds                                                                                                | p-388               | A-549 | HT-29               | MEL-28 |
|----------------------------------------------------------------------------------------------------------|---------------------|-------|---------------------|--------|
| 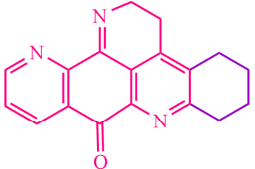<br><b>98</b>         | 1.74                | 0.04  | 0.3                 | 0.17   |
| <br><b>101</b>        | >35.9               | 45    | 18.0                | 18.0   |
| <br><b>Ascidiemin</b> | 0.4 <sup>[81]</sup> |       | 0.3 <sup>[81]</sup> |        |

**Table S5.** Antitumor activity (IC<sub>50</sub>\*10<sup>-6</sup>M).

| Compounds                                                                           | U-87MG | U-373MG | SW1088 | T24    | J82 | HCT-15 | LoVo | MCF7  | T-47D | A-549 | A-427 | PC-3   |
|-------------------------------------------------------------------------------------|--------|---------|--------|--------|-----|--------|------|-------|-------|-------|-------|--------|
| 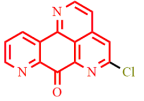   | 5      | 5       | 7      | 6      | >10 | 6      | 6    | 7     | >10   | 6     | 5     | >10    |
|    | 2      | 5       | 5      | 6      | 6   | 4      | 5    | 4     | 5     | 7     | 4     | 6      |
|    | 3      | 5       | 4      | 4      | >10 | 6      | 6    | 2     | 9     | 5     | 7     | 7      |
|    | 0.9    | 0.4     | 0.1    | 0.08   | 4   | 0.7    | 0.2  | 0.3   | 0.9   | 6     | 2     | 0.7    |
|    | 0.9    | 0.7     | 0.009  | 0.009  | >10 | 0.9    | 0.8  | 0.5   | >10   | 1     | 0.08  | 0.007  |
|   | 0.09   | 0.05    | 0.05   | 0.02   | 0.5 | 0.08   | 0.03 | 0.02  | 0.6   | 0.5   | 0.4   | 0.05   |
|  | 0.7    | 0.6     | 0.5    | 0.5    | 0.7 | 0.9    | 4    | 0.5   | 5     | 0.6   | 0.3   | 0.6    |
|  | 0.08   | 0.3     | 0.002  | 0.0004 | 5   | 0.09   | 0.06 | 0.009 | 0.006 | 0.7   | 0.006 | 0.0004 |
|  | 0.05   | 0.07    | 0.08   | 0.06   | 0.8 | 0.09   | 0.7  | 0.06  | 6     | 0.05  | 0.07  | 0.08   |
|  | 2      | 0.6     | 4      | 0.7    | 4   | 3      | 4    | 0.8   | 4     | 6     | 0.6   | 0.5    |
|  | >10    | >10     | >10    | >10    | >10 | >10    | >10  | >10   | >10   | 8     | >10   | >10    |
|  | 6      | 5       | 5      | 5      | 3   | 6      | 6    | 2     | 4     | 5     | 3     | 6      |
